# Supplementary material
Source: Springer Nature journal article supplement (https://www.springermedizin.de/resource/supplementary/13019_2013_817_MOESM3_ESM.pdf/9639158)

# ROC-Curve

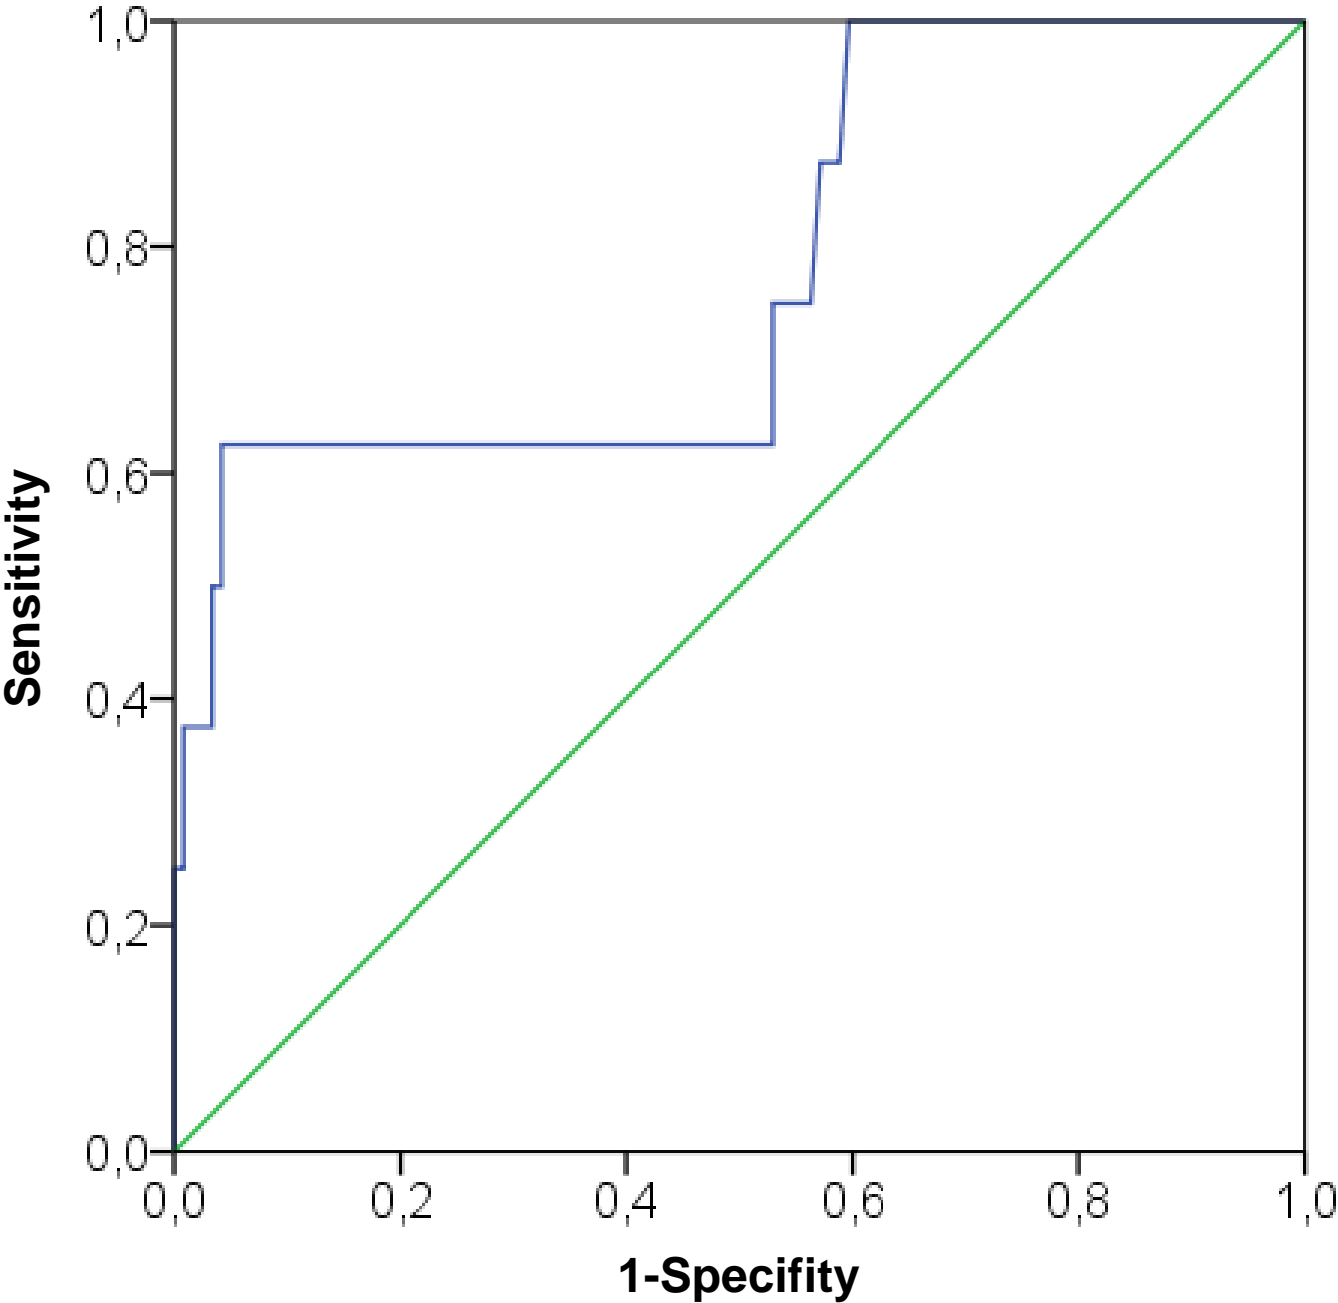

Supplement: MOESM3 [file 9639158]
